# Supplementary material
Source: PubMed Central journal article supplement (PMC4630160)
Supplement: NIHMS712854-supplement-1.pdf [file NIHMS712854-supplement-1.pdf]

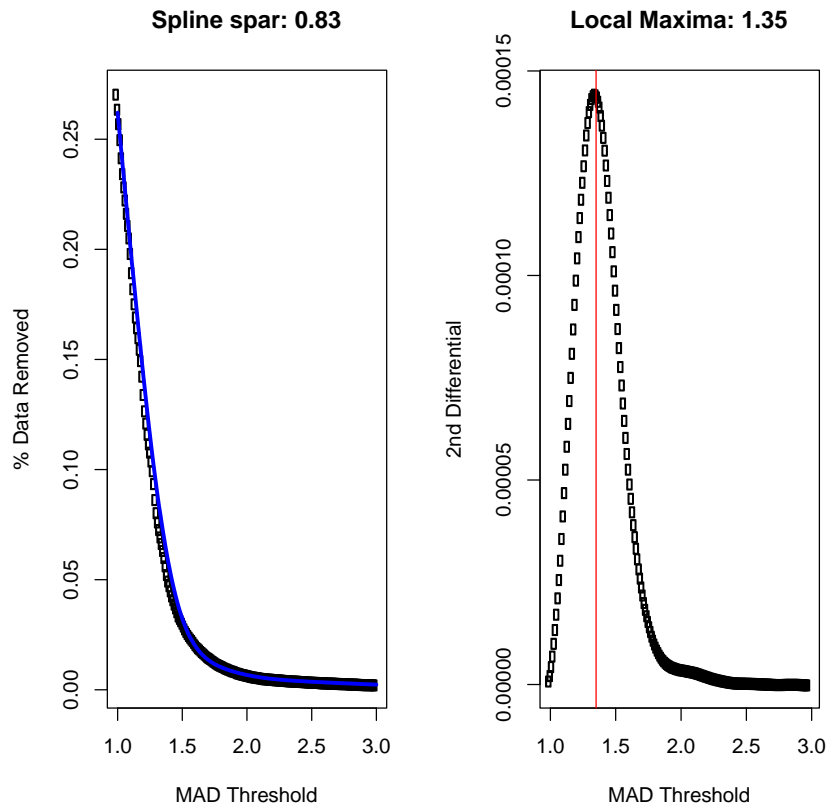

The left panel plots of the amount of data removed (y-axis) by median absolute deviance (MAD) threshold (x-axis). The blue line represents the fit of a smoothing spline with a smoothing parameter (spar) of .83, which was the ideal amount of smoothing necessary based on a separate optimization process. The right panel plots the second differential (y-axis) of the blue smoothed line from the left across the different MAD thresholds. The vertical red line identifies the location of the inflection point of the blue line, which is the optimum MAD threshold used for cleaning the tapping data.
