# Supplementary material
Source: PubMed Central journal article supplement (PMC4630160)
Supplement: NIHMS712854-supplement-2.pdf [file NIHMS712854-supplement-2.pdf]

**Supplementary Table 1: Estimated values of the model coefficients for the model of synchronization accuracy (relative error).**

| <b>Effect</b>                           | <b>Estimate</b> | <b>Lower CI</b> | <b>Upper CI</b> |
|-----------------------------------------|-----------------|-----------------|-----------------|
| Intercept (250 ms, OHC)                 | 1.01281         | 0.99076         | 1.03486         |
| ns(Tap Time, df = 4) 1                  | -0.01435        | -0.03255        | 0.00385         |
| ns(Tap Time, df = 4) 2                  | -0.00843        | -0.02303        | 0.00616         |
| ns(Tap Time, df = 4) 3                  | -0.03665        | -0.08371        | 0.01041         |
| ns(Tap Time, df = 4) 4                  | 0.00115         | -0.01529        | 0.01759         |
| Group (PD-C)                            | -0.06126        | -0.09164        | -0.03088        |
| Group (PD-FOG)                          | -0.06098        | -0.09535        | -0.02660        |
| ISI (500 ms)                            | -0.01828        | -0.02760        | -0.00896        |
| ISI (750 ms)                            | 0.00522         | -0.00411        | 0.01454         |
| ns(Tap Time, df = 4) 1 x Group (PD-C)   | 0.03971         | 0.01531         | 0.06412         |
| ns(Tap Time, df = 4) 2 x Group (PD-C)   | 0.02596         | 0.00671         | 0.04521         |
| ns(Tap Time, df = 4) 3 x Group (PD-C)   | 0.09429         | 0.03020         | 0.15838         |
| ns(Tap Time, df = 4) 4 x Group (PD-C)   | 0.02294         | 0.00011         | 0.04576         |
| ns(Tap Time, df = 4) 1 x Group (PD-FOG) | 0.04762         | 0.01994         | 0.07531         |
| ns(Tap Time, df = 4) 2 x Group (PD-FOG) | 0.03980         | 0.01765         | 0.06194         |
| ns(Tap Time, df = 4) 3 x Group (PD-FOG) | 0.12729         | 0.05468         | 0.19991         |
| ns(Tap Time, df = 4) 4 x Group (PD-FOG) | 0.02210         | -0.00598        | 0.05019         |
| ns(Tap Time, df = 4) 1 x ISI (500 ms)   | 0.01249         | 0.00218         | 0.02281         |
| ns(Tap Time, df = 4) 2 x ISI (500 ms)   | 0.00912         | -0.00196        | 0.02019         |
| ns(Tap Time, df = 4) 3 x ISI (500 ms)   | 0.04830         | 0.02552         | 0.07108         |
| ns(Tap Time, df = 4) 4 x ISI (500 ms)   | -0.00560        | -0.02266        | 0.01146         |
| ns(Tap Time, df = 4) 1 x ISI (750 ms)   | -0.00252        | -0.01294        | 0.00791         |
| ns(Tap Time, df = 4) 2 x ISI (750 ms)   | -0.00601        | -0.01748        | 0.00545         |
| ns(Tap Time, df = 4) 3 x ISI (750 ms)   | -0.01148        | -0.03442        | 0.01147         |
| ns(Tap Time, df = 4) 4 x ISI (750 ms)   | -0.00517        | -0.02418        | 0.01385         |
| Group (PD-C) x ISI (500 ms)             | 0.01675         | 0.01209         | 0.02142         |
| Group (PD-FOG) x ISI (500 ms)           | -0.00288        | -0.00852        | 0.00275         |
| Group (PD-C) x ISI (750 ms)             | 0.01484         | 0.01014         | 0.01955         |
| Group (PD-FOG) x ISI (750 ms)           | -0.00285        | -0.00870        | 0.00299         |

CI, confidence interval; ns, natural spline, with degrees of freedom and degree indicated.
