# Supplementary material
Source: PubMed Central journal article supplement (PMC4630160)
Supplement: NIHMS712854-supplement-3.pdf [file NIHMS712854-supplement-3.pdf]

**Supplementary Table 2: Estimated values of the model coefficients for the model of continuation accuracy (relative error).**

| <b>Effect</b>                                                | <b>Estimate</b> | <b>Lower CI</b> | <b>Upper CI</b> |
|--------------------------------------------------------------|-----------------|-----------------|-----------------|
| Intercept (250 ms, OHC, No Gap)                              | 0.98460         | 0.95902         | 1.01018         |
| ns(Tap Time, df = 3) 1                                       | -0.00498        | -0.02210        | 0.01214         |
| ns(Tap Time, df = 3) 2                                       | 0.01341         | -0.02786        | 0.05404         |
| ns(Tap Time, df = 3) 3                                       | 0.01230         | -0.01631        | 0.04091         |
| Group (PD-C)                                                 | -0.02995        | -0.06617        | 0.00627         |
| Group (PD-FOG)                                               | 0.01575         | -0.02535        | 0.05685         |
| Gap Presence (Gap)                                           | 0.03962         | 0.02051         | 0.05873         |
| ISI (500 ms)                                                 | 0.02382         | 0.00560         | 0.04204         |
| ISI (750 ms)                                                 | 0.00965         | -0.00827        | 0.02757         |
| ns(Tap Time, df = 3) 1 x Group (PD-C)                        | -0.00180        | -0.02627        | 0.02267         |
| ns(Tap Time, df = 3) 2 x Group (PD-C)                        | 0.03336         | -0.02535        | 0.09207         |
| ns(Tap Time, df = 3) 3 x Group (PD-C)                        | 0.01048         | -0.03047        | 0.05141         |
| ns(Tap Time, df = 3) 1 x Group (PD-FOG)                      | 0.00866         | -0.02128        | 0.03860         |
| ns(Tap Time, df = 3) 2 x Group (PD-FOG)                      | -0.04389        | -0.11281        | 0.02503         |
| ns(Tap Time, df = 3) 3 x Group (PD-FOG)                      | -0.00047        | -0.05086        | 0.04992         |
| ns(Tap Time, df = 3) 1 x Gap Presence (Gap)                  | -0.02078        | -0.03990        | -0.00166        |
| ns(Tap Time, df = 3) 2 x Gap Presence (Gap)                  | -0.03967        | -0.08542        | 0.00608         |
| ns(Tap Time, df = 3) 3 x Gap Presence (Gap)                  | -0.01647        | -0.03588        | 0.00294         |
| Group (PD-C) x Gap Presence (Gap)                            | 0.01476         | -0.01241        | 0.04193         |
| Group (PD-FOG) x Gap Presence (Gap)                          | -0.04471        | -0.07629        | -0.01313        |
| ns(Tap Time, df = 3) 1 x ISI (500 ms)                        | -0.00893        | -0.02998        | 0.01211         |
| ns(Tap Time, df = 3) 2 x ISI (500 ms)                        | -0.03631        | -0.08364        | 0.01102         |
| ns(Tap Time, df = 3) 3 x ISI (500 ms)                        | -0.02540        | -0.05506        | 0.00426         |
| ns(Tap Time, df = 3) 1 x ISI (750 ms)                        | -0.02970        | -0.05169        | -0.00771        |
| ns(Tap Time, df = 3) 2 x ISI (750 ms)                        | -0.07838        | -0.12737        | -0.02939        |
| ns(Tap Time, df = 3) 3 x ISI (750 ms)                        | 0.00511         | -0.03132        | 0.04154         |
| Group (PD-C) x ISI (500 ms)                                  | 0.03878         | 0.01236         | 0.06520         |
| Group (PD-FOG) x ISI (500 ms)                                | -0.04769        | -0.07683        | -0.01855        |
| Group (PD-C) x ISI (750 ms)                                  | 0.03254         | 0.00689         | 0.05819         |
| Group (PD-FOG) x ISI (750 ms)                                | -0.06467        | -0.09391        | -0.03543        |
| Gap Presence (Gap) x ISI (500 ms)                            | -0.03944        | -0.06546        | -0.01342        |
| Gap Presence (Gap) x ISI (750 ms)                            | -0.08308        | -0.10898        | -0.05718        |
| ns(Tap Time, df = 3) 1 x Group (PD-C) x Gap Presence (Gap)   | 0.00363         | -0.02403        | 0.03123         |
| ns(Tap Time, df = 3) 2 x Group (PD-C) x Gap Presence (Gap)   | -0.03453        | -0.09984        | 0.03078         |
| ns(Tap Time, df = 3) 3 x Group (PD-C) x Gap Presence (Gap)   | 0.00703         | -0.02171        | 0.03571         |
| ns(Tap Time, df = 3) 1 x Group (PD-FOG) x Gap Presence (Gap) | 0.00545         | -0.02982        | 0.04072         |
| ns(Tap Time, df = 3) 2 x Group (PD-FOG) x Gap Presence (Gap) | 0.07461         | -0.00352        | 0.15274         |
| ns(Tap Time, df = 3) 3 x Group (PD-FOG) x Gap Presence (Gap) | 0.04477         | 0.00427         | 0.08527         |
| ns(Tap Time, df = 3) 1 x Group (PD-C) x ISI (500 ms)         | -0.01043        | -0.04122        | 0.02036         |

|                                                                             |          |          |         |
|-----------------------------------------------------------------------------|----------|----------|---------|
| ns(Tap Time, df = 3) 2 x Group (PD-C) x ISI (500 ms)                        | -0.09414 | -0.16324 | -0.0250 |
| ns(Tap Time, df = 3) 3 x Group (PD-C) x ISI (500 ms)                        | -0.01534 | -0.05960 | 0.0289  |
| ns(Tap Time, df = 3) 1 x Group (PD-FOG) x ISI (500 ms)                      | -0.03081 | -0.06658 | 0.0049  |
| ns(Tap Time, df = 3) 2 x Group (PD-FOG) x ISI (500 ms)                      | 0.02826  | -0.04900 | 0.1055  |
| ns(Tap Time, df = 3) 3 x Group (PD-FOG) x ISI (500 ms)                      | 0.01354  | -0.03801 | 0.0651  |
| ns(Tap Time, df = 3) 1 x Group (PD-C) x ISI (750 ms)                        | -0.04976 | -0.08115 | -0.0183 |
| ns(Tap Time, df = 3) 2 x Group (PD-C) x ISI (750 ms)                        | -0.08205 | -0.15300 | -0.0111 |
| ns(Tap Time, df = 3) 3 x Group (PD-C) x ISI (750 ms)                        | -0.04646 | -0.10060 | 0.0076  |
| ns(Tap Time, df = 3) 1 x Group (PD-FOG) x ISI (750 ms)                      | -0.03978 | -0.07810 | -0.0014 |
| ns(Tap Time, df = 3) 2 x Group (PD-FOG) x ISI (750 ms)                      | 0.01575  | -0.06640 | 0.0978  |
| ns(Tap Time, df = 3) 3 x Group (PD-FOG) x ISI (750 ms)                      | -0.06833 | -0.13251 | -0.0041 |
| ns(Tap Time, df = 3) 1 x Gap Presence (Gap) x ISI (500 ms)                  | 0.01630  | -0.01487 | 0.0474  |
| ns(Tap Time, df = 3) 2 x Gap Presence (Gap) x ISI (500 ms)                  | 0.08421  | 0.01334  | 0.1550  |
| ns(Tap Time, df = 3) 3 x Gap Presence (Gap) x ISI (500 ms)                  | 0.05304  | 0.00234  | 0.1037  |
| ns(Tap Time, df = 3) 1 x Gap Presence (Gap) x ISI (750 ms)                  | 0.02715  | -0.00567 | 0.0599  |
| ns(Tap Time, df = 3) 2 x Gap Presence (Gap) x ISI (750 ms)                  | 0.13741  | 0.06169  | 0.2131  |
| ns(Tap Time, df = 3) 3 x Gap Presence (Gap) x ISI (750 ms)                  | 0.07155  | 0.00751  | 0.1355  |
| Group (PD-C) x Gap Presence (Gap) x ISI (500 ms)                            | -0.02638 | -0.06402 | 0.0112  |
| Group (PD-FOG) x Gap Presence (Gap) x ISI (500 ms)                          | 0.02110  | -0.02035 | 0.0625  |
| Group (PD-C) x Gap Presence (Gap) x ISI (750 ms)                            | -0.00472 | -0.04164 | 0.0321  |
| Group (PD-FOG) x Gap Presence (Gap) x ISI (750 ms)                          | 0.07168  | 0.02918  | 0.1141  |
| ns(Tap Time, df = 3) 1 x Group (PD-C) x Gap Presence (Gap) x ISI (500 ms)   | 0.00597  | -0.03888 | 0.0508  |
| ns(Tap Time, df = 3) 2 x Group (PD-C) x Gap Presence (Gap) x ISI (500 ms)   | 0.08433  | -0.01791 | 0.1865  |
| ns(Tap Time, df = 3) 3 x Group (PD-C) x Gap Presence (Gap) x ISI (500 ms)   | -0.01617 | -0.08866 | 0.0563  |
| ns(Tap Time, df = 3) 1 x Group (PD-FOG) x Gap Presence (Gap) x ISI (500 ms) | -0.01874 | -0.07095 | 0.0334  |
| ns(Tap Time, df = 3) 2 x Group (PD-FOG) x Gap Presence (Gap) x ISI (500 ms) | -0.07622 | -0.18994 | 0.0375  |
| ns(Tap Time, df = 3) 3 x Group (PD-FOG) x Gap Presence (Gap) x ISI (500 ms) | -0.03398 | -0.11670 | 0.0487  |
| ns(Tap Time, df = 3) 1 x Group (PD-C) x Gap Presence (Gap) x ISI (750 ms)   | 0.03127  | -0.01577 | 0.0783  |
| ns(Tap Time, df = 3) 2 x Group (PD-C) x Gap Presence (Gap) x ISI (750 ms)   | 0.01438  | -0.09459 | 0.1233  |
| ns(Tap Time, df = 3) 3 x Group (PD-C) x Gap Presence (Gap) x ISI (750 ms)   | -0.01717 | -0.11091 | 0.0765  |
| ns(Tap Time, df = 3) 1 x Group (PD-FOG) x Gap Presence (Gap) x ISI (750 ms) | 0.02731  | -0.02889 | 0.0835  |
| ns(Tap Time, df = 3) 2 x Group (PD-FOG) x Gap Presence (Gap) x ISI (750 ms) | -0.16696 | -0.29131 | -0.0426 |
| ns(Tap Time, df = 3) 3 x Group (PD-FOG) x Gap Presence (Gap) x ISI (750 ms) | -0.10133 | -0.20571 | 0.0030  |

CI, confidence interval; ns, natural spline, with degrees of freedom and degree indicated.
